# Supplementary material for: CO2 adsorption and catalytic application of imidazole ionic liquid functionalized porous organic polymers
Source: Royal Society of Chemistry journal article supplement (doi:10.1039/c6py02091g), 2017-01-01
Supplement: c6py02091g1.pdf [file c6py02091g1.pdf]

**CO<sub>2</sub> adsorption and catalytic application of imidazole ionic liquid functionalized  
porous organic polymers**

Shuang Hao, Yuchuan Liu, Chuning Shang, Zhiqiang Liang\* and Jihong Yu\*

State Key Laboratory of Inorganic Synthesis & Preparative Chemistry, Jilin

University, Changchun, 130012, P. R. China

Email: [liangzq@jlu.edu.cn](mailto:liangzq@jlu.edu.cn); [jihong@jlu.edu.cn](mailto:jihong@jlu.edu.cn)

**Supporting Information**

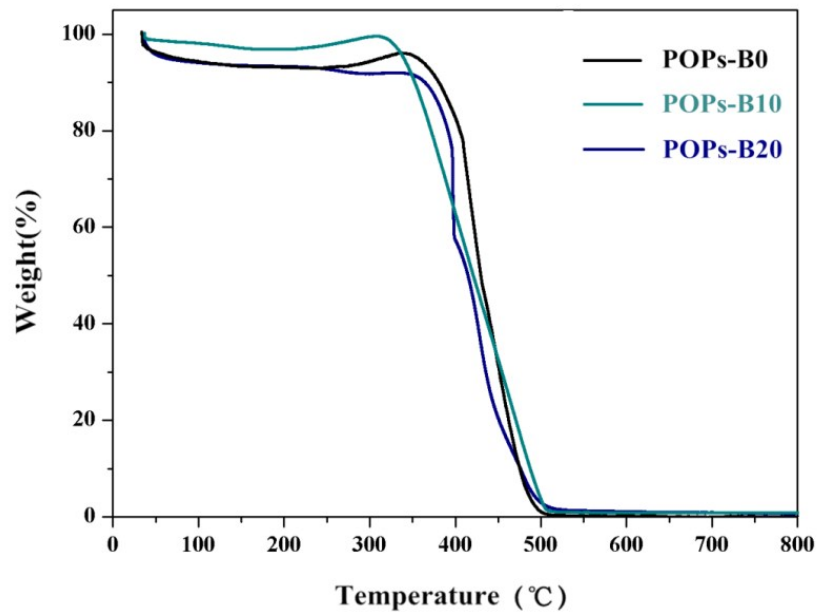

**Fig. S1** TG analysis of POPs-B0, POPs-B10 and POPs-B20.

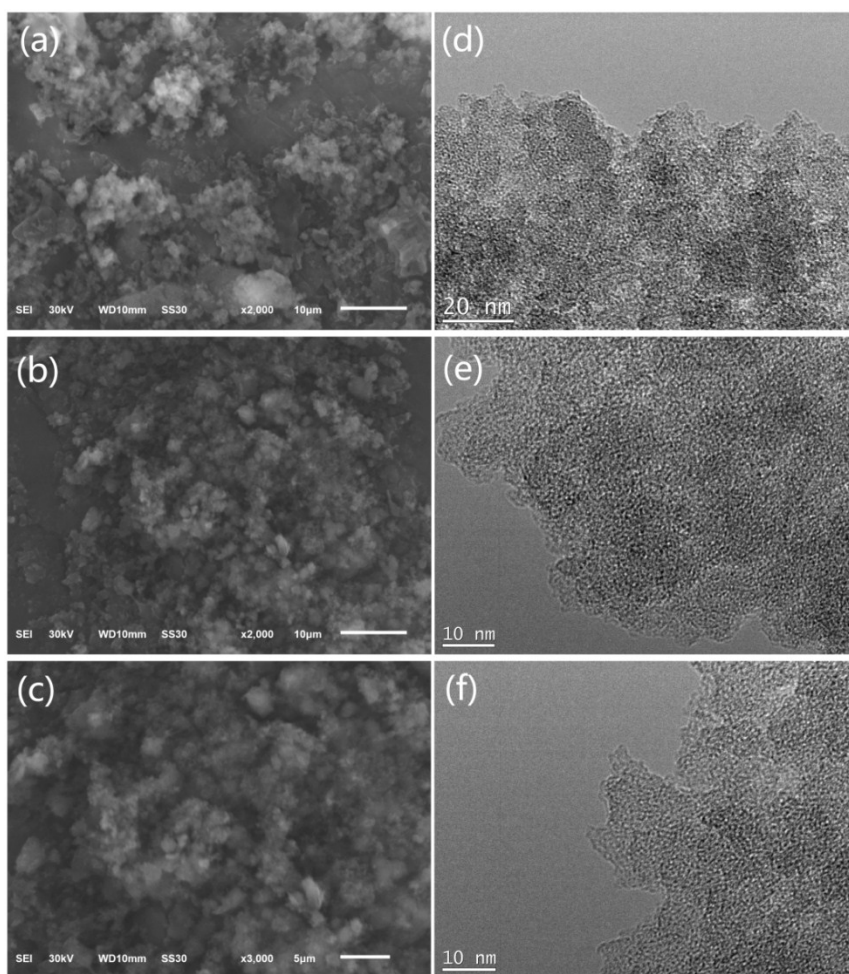

**Fig. S2** SEM (a-c) and TEM images (d-f) of POPs-B0, POPs-B10 and POPs-B20

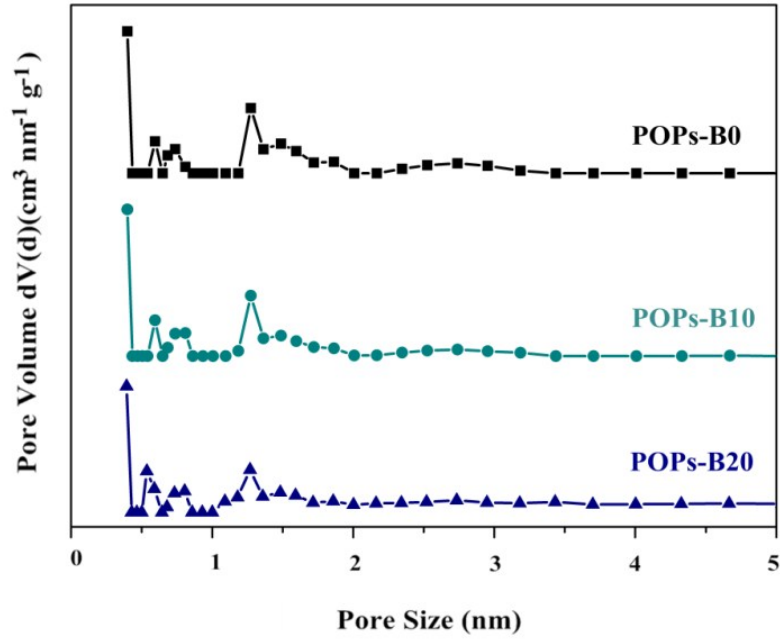

**Fig. S3** Pore size distribution of **POPs-B0**, **POPs-B10** and **POPs-B20** calculated using NL-DFT methods.

### Heat of CO<sub>2</sub> Adsorption Calculation

The isosteric heats ( $Q_{st}$ ) of adsorption for **POPs-B0**, **POPs-B10** and **POPs-B20** were calculated by fitting the CO<sub>2</sub> adsorption isotherms measured at 273 K, 283 K and 298 K to the Virial equation.

$$\ln P = \ln N + \frac{1}{T} \sum_{i=0}^m a_i N_i + \sum_{i=0}^n b_j N_i$$

$$Q_{st} = -R \sum_{i=0}^m a_i N_i$$

$N$ : adsorbed volume (cm<sup>3</sup>/g);

$P$ : pressure (mmHg);

$T$ : temperature (K);

$a_i, b_j$ : constants;

$R$ : 8.314 J·mol<sup>-1</sup>·K<sup>-1</sup>

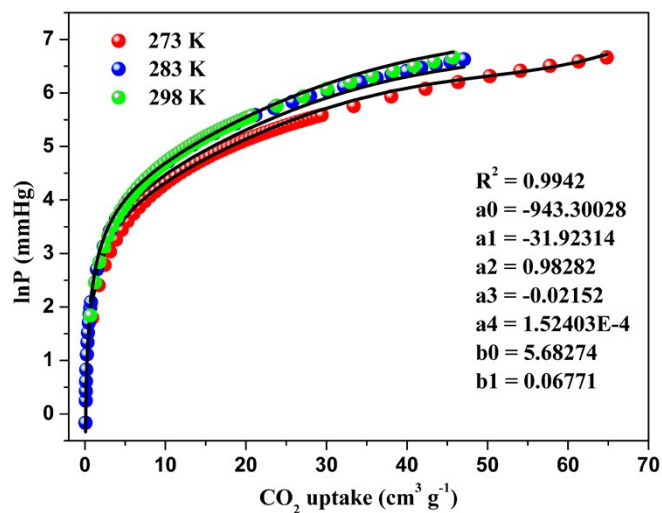

Fig. S4 Virial fitting for CO<sub>2</sub> isotherms of POPs-B0.

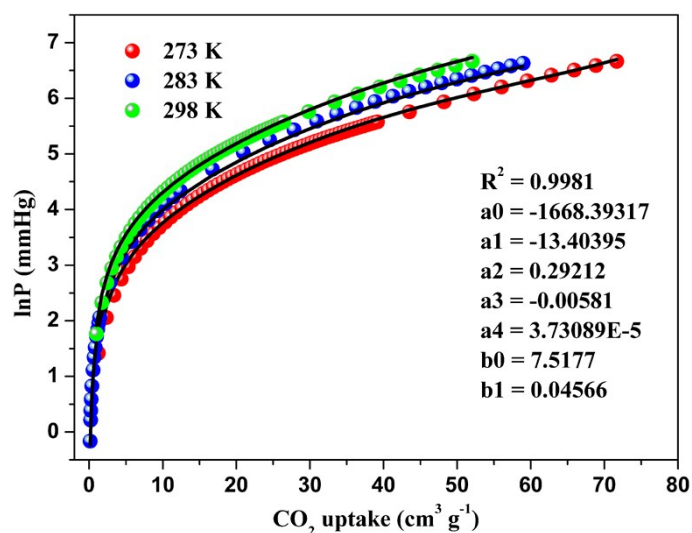

Fig. S5 Virial fitting for CO<sub>2</sub> isotherms of POPs-B10.

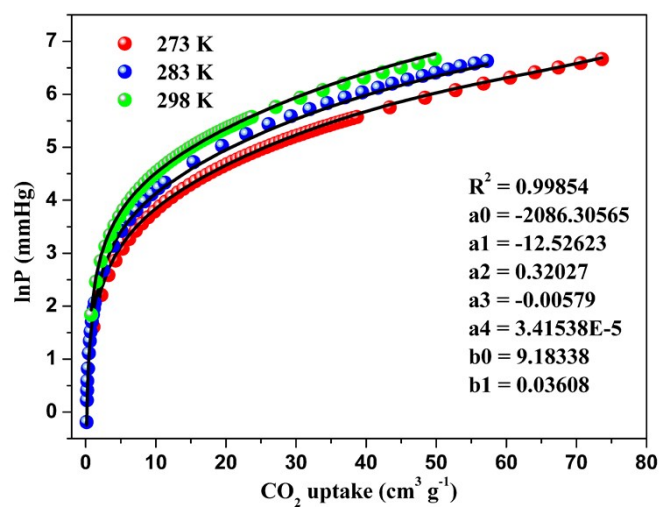

Fig. S6 Virial fitting for CO<sub>2</sub> isotherms of POPs-B20.

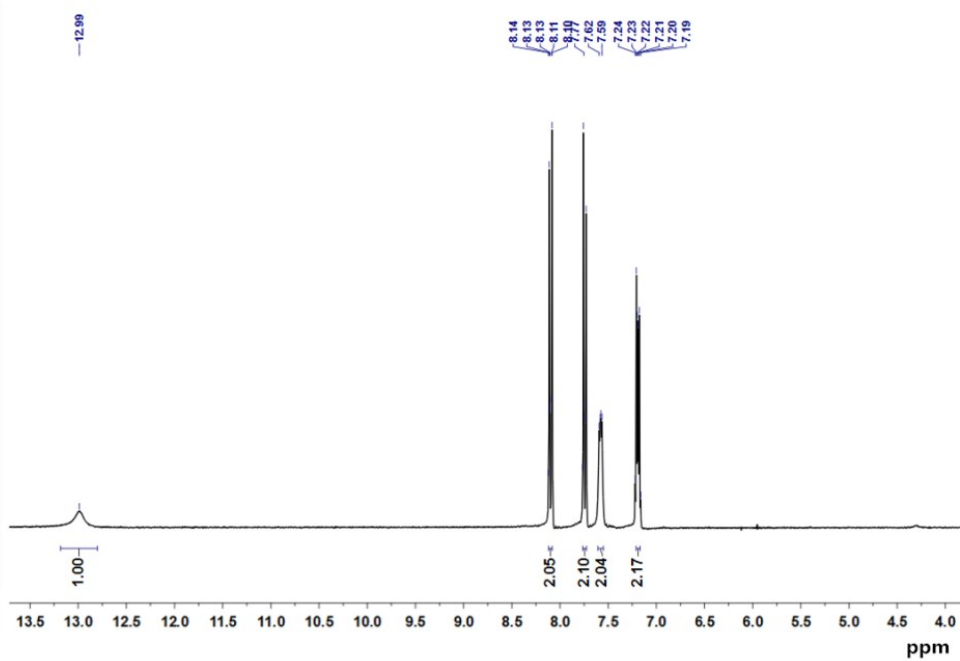

Fig. S7  $^1\text{H}$  NMR spectrum of 2-(4-bromophenyl)-1H-benzimidazole.

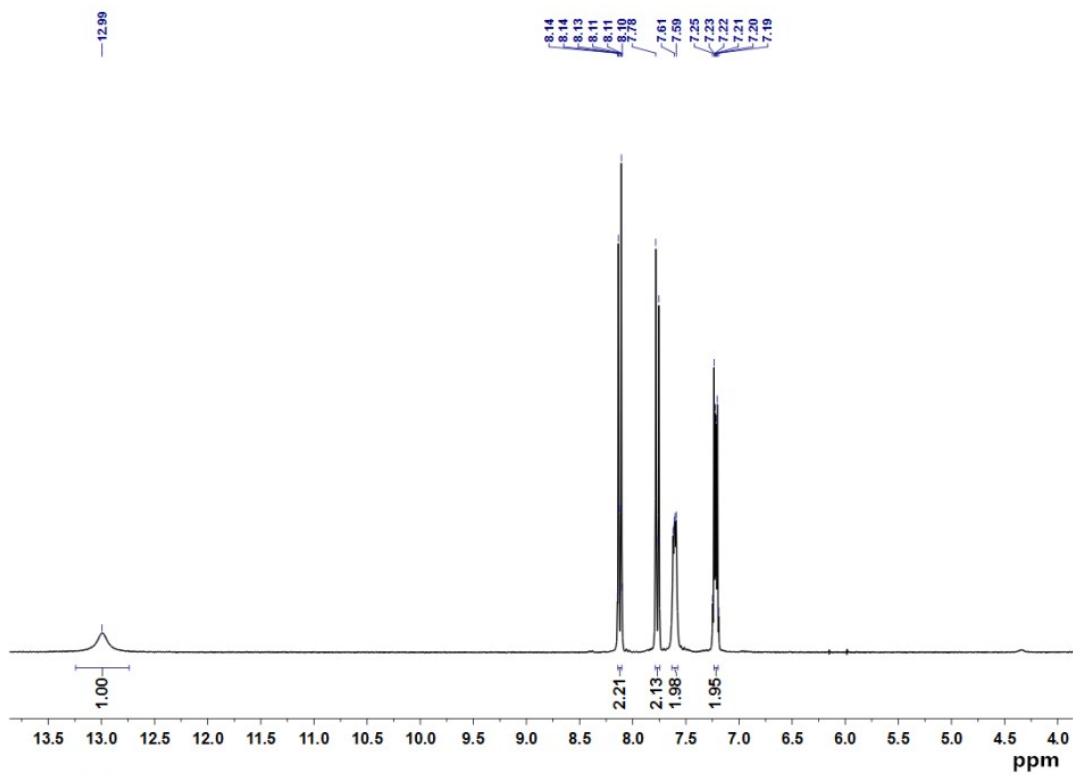

Fig. S8  $^1\text{H}$  NMR spectrum of 2-(4-cyanophenyl)-1H-benzimidazole.

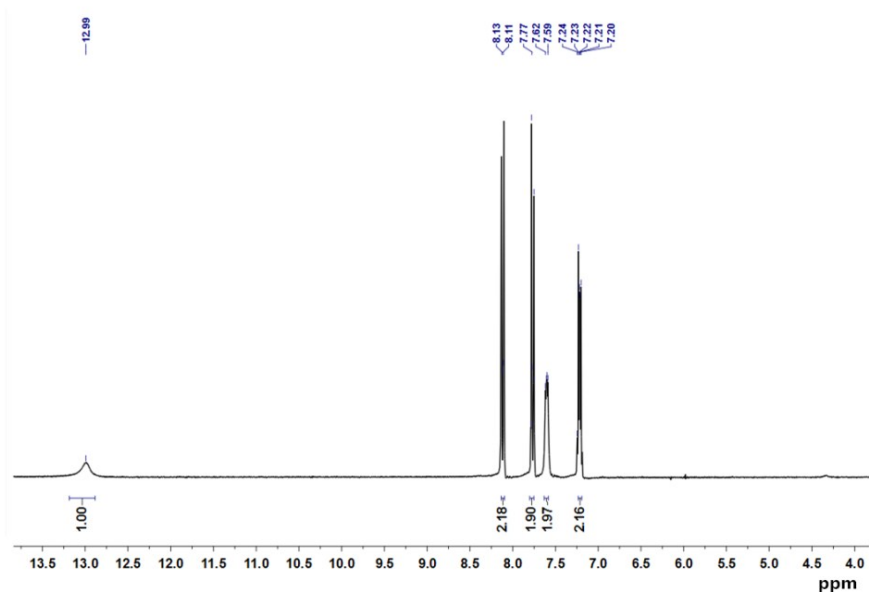

**Fig. S9**  $^1\text{H}$  NMR spectrum of 2-(4-chlorophenyl)-1H-benzimidazole.

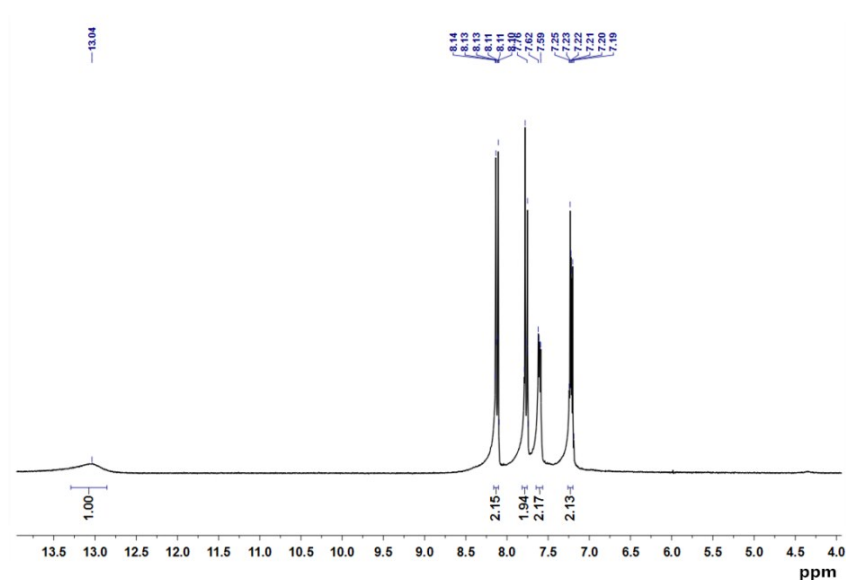

**Fig. S10**  $^1\text{H}$  NMR spectrum of 2-(4-nitrophenyl)-1H-benzimidazole.

**Table S1** Elemental analysis of **POPs-B0**, **POPs-B10** and **POPs-B20**.

| Sample   | Observed Values |       |       | Theoretical Values |       |       |
|----------|-----------------|-------|-------|--------------------|-------|-------|
|          | C [%]           | H [%] | N [%] | C [%]              | H [%] | N [%] |
| POPs-B0  | 82.16           | 5.45  | 0     | 94.12              | 5.88  | 0     |
| POPs-B10 | 80.60           | 5.09  | 1.41  | 88.97              | 5.92  | 2.26  |
| POPs-B20 | 86.20           | 5.96  | 3.77  | 85.53              | 5.93  | 3.77  |

**Table S2** ICP analyses of **POPs-B0**, **POPs-B10** and **POPs-B20**.

| Sample   | Fe [‰] |
|----------|--------|
| POPs-B0  | 0.042  |
| POPs-B10 | 0.031  |
| POPs-B20 | 0.036  |

**Table S3** The yields of POPs.

| POPs       | <i>p</i> -DCX                             | N-MI              | -HCl                                          | Calculated | Found  | Yield (%) |
|------------|-------------------------------------------|-------------------|-----------------------------------------------|------------|--------|-----------|
| <b>B0</b>  | $\frac{963 \text{ mg}}{5.5 \text{ mmol}}$ | -                 | $\frac{401.5 \text{ mg}}{11.0 \text{ mmol}}$  | 561.5 mg   | 547 mg | 97.4      |
| <b>B10</b> | $\frac{963 \text{ mg}}{5.5 \text{ mmol}}$ | 41 mg<br>0.5 mmol | $\frac{383.25 \text{ mg}}{10.5 \text{ mmol}}$ | 620.75 mg  | 566 mg | 91.2      |
| <b>B20</b> | $\frac{963 \text{ mg}}{5.5 \text{ mmol}}$ | 75 mg<br>0.9 mmol | $\frac{368.65 \text{ mg}}{10.1 \text{ mmol}}$ | 669.35 mg  | 604 mg | 90.2      |

**Table S4** Summary of CO<sub>2</sub> uptakes in porous organic polymers at 273 K and 1 atm.

| POPs                   | CO <sub>2</sub> uptake (mmol/g) | Ref.      | POPs                    | CO <sub>2</sub> uptake (mmol/g) | Ref. |
|------------------------|---------------------------------|-----------|-------------------------|---------------------------------|------|
| POPs-B10               | 3.20                            | This work | POM1-IM                 | 3.12                            | 8    |
| POPs-B20               | 3.29                            |           | POM2-IM                 | 3.30                            |      |
| GPOP-1                 | 2.0                             | 1         | POM3-IM                 | 3.23                            |      |
| GPOP-2                 | 2.39                            |           | POM4-IM                 | 2.41                            |      |
| GPOP-3                 | 2.77                            |           | POM5-IM                 | 1.30                            |      |
| Th-1                   | 2.89                            | 2         | POM6-IM                 | 1.25                            | 9    |
| Py-1                   | 2.70                            |           | Glc-1                   | 2.29                            |      |
| Fu-1                   | 2.20                            |           | Glc-2                   | 2.37                            |      |
| THPS                   | 3.57                            | 3         | Glc-3                   | 2.41                            |      |
| PAF-32                 | 1.66                            | 4         | Gal-1                   | 2.69                            |      |
| PAF-32-NH <sub>2</sub> | 1.62                            |           | Gal-1                   | 2.35                            |      |
| PAF-32-OH              | 2.27                            |           | Ara-1                   | 1.69                            |      |
| TSP-1                  | 3.0                             | 5         | CB-PCP-1                | 2.05                            | 10   |
| TSP-2                  | 4.1                             |           | CMP-1-NH <sub>2</sub>   | 1.64                            | 11   |
| CPOP-16                | 2.34                            | 6         | CMP-1-(OH) <sub>2</sub> | 1.80                            |      |
| CPOP-17                | 2.50                            |           | CMP-1-COOH              | 1.60                            |      |
| CPOP-18                | 3.43                            |           | PAF-1                   | 2.05                            | 12   |
| CPOP-19                | 3.80                            | PAF-3     | 3.48                    |                                 |      |
| HCP-1                  | 3.01                            | 7         | PAF-4                   | 2.41                            | 13   |
| HCP 2                  | 3.30                            |           | PCBZ                    | 1.13                            |      |
| Hcp-3                  | 3.24                            |           | PCBZL                   | 1.46                            |      |
| Hcp-4                  | 3.92                            |           | CPOP-1                  | 4.82                            | 14   |

## References

1. T. Wang, Y.-C. Zhao, M. Luo, L.-M. Zhang, Y. Cui, C.-S. Zhang and B.-H. Han, *Polymer*, 2015, **60**, 26.
2. Y. L. Luo, B. Y. Li, W. Wang, K. B. Wu and B. E. Tan, *Adv. Mater.*, 2012, **24**,



5703.

3. C. Zhang, P.-C. Zhu, L. X. Tan, J.-M. Liu, B. E. Tan, X.-L. Yang and H.-B. Xu, *Macromolecules*, 2015, **48**, 8509.
4. X. F. Jing, D. L. Zou, P. Cui, H. Ren and G. S. Zhu, *J. Mater. Chem. A*, 2013, **1**, 13926.
5. X. Zhu, S. M. Mahurin, S.-H. An, C.-L. Do-Thanh, C. C. Tian, Y. K. Li, L. W. Gill, E. W. Hagaman, Z. J. Bian, J.-H. Zhou, J. Hu, H. L. Liu and S. Dai, *Chem. Commun.*, 2014, **50**, 7933.
6. L. Pan, Q. Chen, J.-H. Zhu, J.-G. Yu, Y.-J. He and B.-H. Han, *Polym. Chem.*, 2015, **6**, 2478.
7. C. F. Martín, E. Stöckel, R. Clowes, D. J. Adams, A. I. Cooper, J. J. Pis, F. Rubiera and C. Pevida, *J. Mater. Chem.*, 2011, **21**, 5475.
8. J. Q. Wang, W. H. Sng, G. S. Yi and Y. G. Zhang, *Chem. Commun.*, 2015, **51**, 12076.
9. H. Y. Li, B. Meng, S. M. Mahurin, S.-H. Chai, K. M. Nelson, D. C. Baker, H. L. Liu and S. Dai, *J. Mater. Chem. A*, 2015, **3**, 20913.
10. A. Dani, V. Crocellà, C. Magistris, V. Santoro, J. Y. Yuan and S. Bordiga, *J. Mater. Chem. A*, 2017, **5**, 372.
11. R. Dawson, D. J. Adams and A. I. Cooper, *Chem. Sci.*, 2011, **2**, 1173.
12. T. Ben, C. Y. Pei, D. L. Zhang, J. Xu, F. Deng, X. F. Jing and S. L. Qiu, *Energy Environ. Sci.*, 2011, **4**, 3991.
13. M. Saleh, S. Bin Baek, H. M. Lee and K. S. Kim, *J. Phys. Chem. C*, 2015, **119**, 5395.
14. Q. Chen, M. Luo, P. Hammershøj, D. Zhou, Y. Han, B. W. Laursen, C.-G. Yan, and B.-H. Han, *J. Am. Chem. Soc.*, 2012, **134**, 6084.
